# Supplementary material
Source: PubMed Central journal article supplement (PMC4376583)
Supplement: NIHMS662478-supplement-1.pdf [file NIHMS662478-supplement-1.pdf]

**A.**

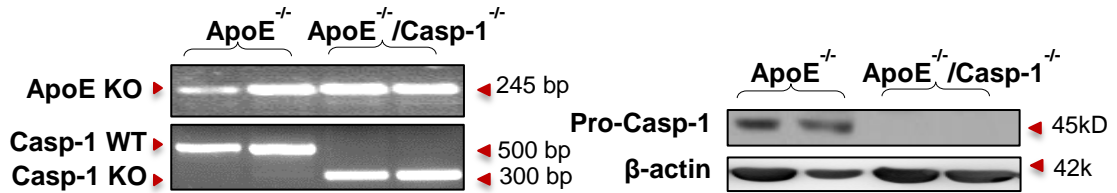

**B.**

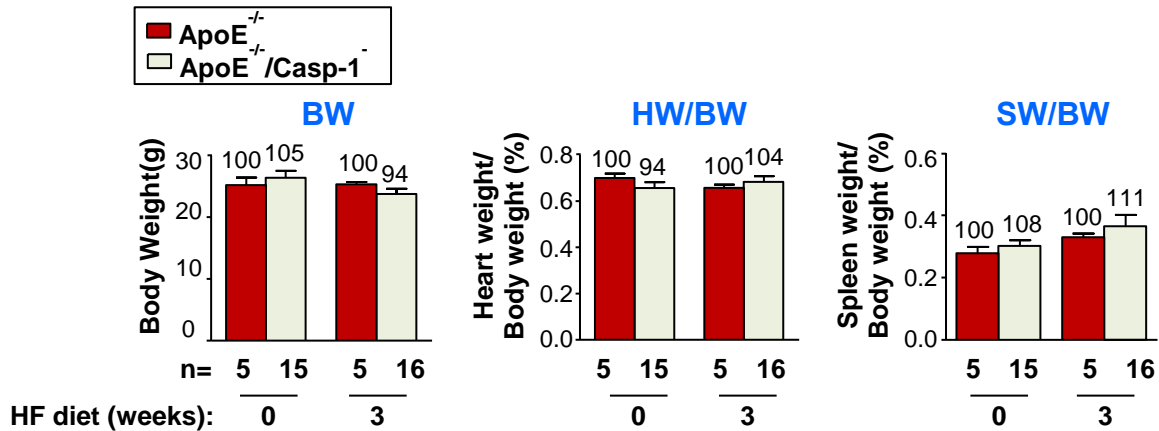

**C.**

|                                                | Cholesterol (mg/dl) |                     | Triglyceride (mg/dl) |            |
|------------------------------------------------|---------------------|---------------------|----------------------|------------|
|                                                | Normal Chow         | HF3w                | Normal Chow          | HF3w       |
| <b>ApoE<sup>-/-</sup></b>                      | 220 ± 67.5 (n=6)    | 587 ± 120.5 (n=3)   | 257.2 ± 55.5         | 289 ± 13.7 |
| <b>ApoE<sup>-/-</sup>/Casp-1<sup>-/-</sup></b> | 320.4 ± 64.6 (n=5)  | 623.25 ± 85.5 (n=4) | 303 ± 28.2           | 328 ± 99.3 |

(P>0.05, no statistical differences between the groups)

**Figure I. Genotyping and characterization of ApoE<sup>-/-</sup>Casp-1<sup>-/-</sup> mice.** **A.** Polymerase chain reaction (PCR) analysis of ApoE and caspase-1 (casp-1) gene expressions in ApoE<sup>-/-</sup> mice and ApoE<sup>-/-</sup>/Casp-1<sup>-/-</sup> mice (left panel). Western blot analysis of pro-casp-1 expression in the aortas of ApoE<sup>-/-</sup> mice and ApoE<sup>-/-</sup>/Casp-1<sup>-/-</sup> mice (right panel) (n=2). **B.** General phenotype of Casp-1 deficiency in ApoE<sup>-/-</sup> mice after 0 or 3 weeks of HF diet: body weight (BW), ratio of heart weight (HW) to BW, and ratio of spleen weight (SW) to BW. **C.** Plasma levels of cholesterol and triglycerides in ApoE<sup>-/-</sup> mice and ApoE<sup>-/-</sup>/Casp-1<sup>-/-</sup> mice after 3 weeks of HF diet (HF3w).

**A.**

|   |        |        |               |       |        |      |       |       |       |          |      |               |       |               |              |        |    |        |    |    |    |    |    |    |
|---|--------|--------|---------------|-------|--------|------|-------|-------|-------|----------|------|---------------|-------|---------------|--------------|--------|----|--------|----|----|----|----|----|----|
|   | 1      | 2      | 3             | 4     | 5      | 6    | 7     | 8     | 9     | 10       | 11   | 12            | 13    | 14            | 15           | 16     | 17 | 18     | 19 | 20 | 21 | 22 | 23 | 24 |
| A | PC     |        |               |       |        |      |       |       |       |          |      |               |       |               |              |        |    |        |    |    |    |    | PC |    |
| B | CXCL13 | C5a    | G-CSF         |       | GM-CSF |      | CCL1  | CCL11 |       | sICAM-1  |      | IFN- $\gamma$ |       | IL-1 $\alpha$ | IL-1 $\beta$ | IL-1ra |    | IL-2   |    |    |    |    |    |    |
| C | IL-3   | IL-4   | IL-5          | IL-6  |        | IL-7 | IL-10 | IL-13 |       | IL-12p70 |      | IL-16         | IL-17 | IL-23         |              | IL-27  |    |        |    |    |    |    |    |    |
| D | CXCL10 | CXCL11 | CXCL1         | M-CSF |        | CCL2 | CCL12 |       | CXCL9 |          | CCL3 |               | CCL4  | MIP-2         |              | CCL5   |    | CXCL12 |    |    |    |    |    |    |
| E | CCL17  | TIMP-1 | TNF- $\alpha$ |       | TREM-1 |      |       |       |       |          |      |               |       |               |              |        |    |        |    |    |    |    |    |    |
| F | PC     |        |               |       |        |      |       |       |       |          |      |               |       |               |              |        |    |        |    |    |    |    | NC |    |

**B.**

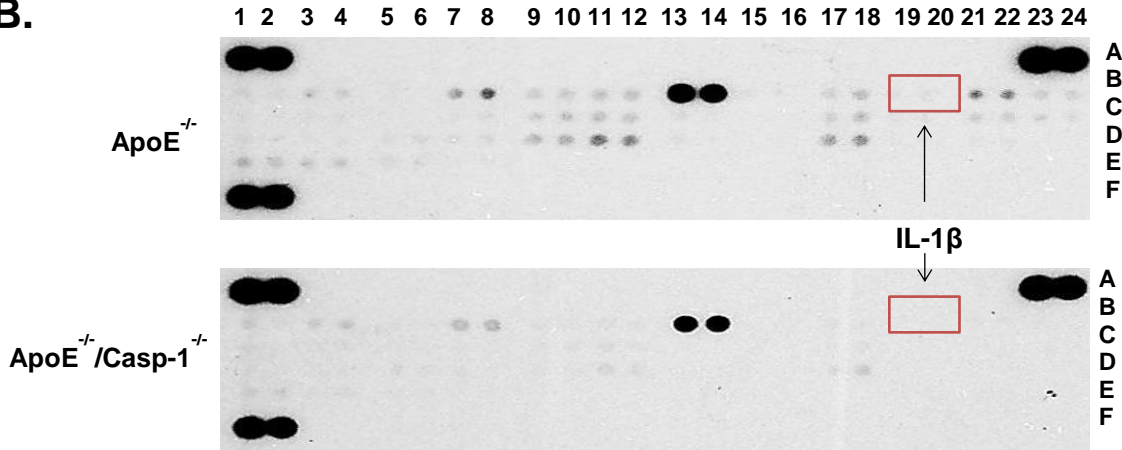

**C.**

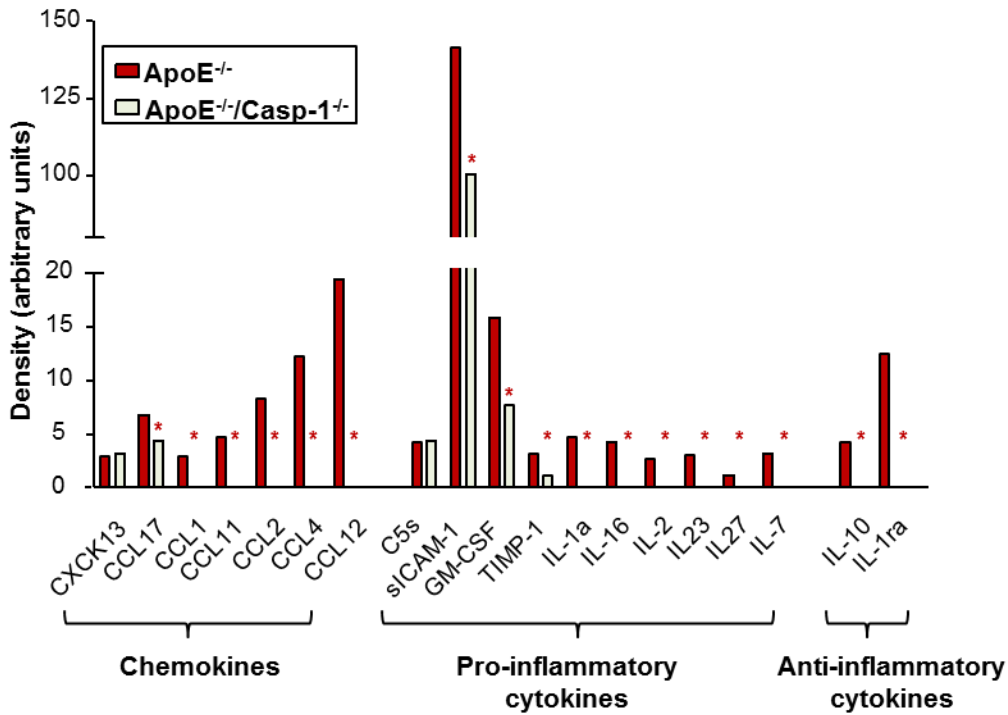

**Figure II. Caspase-1 Deficiency Attenuates Cytokine and Chemokine Expression in ApoE<sup>-/-/Casp-1<sup>-/-</sup> Mouse Aorta.</sup>** **A.** Layout of the cytokine and chemokine array (R&D system). **B.** The representative array images of the aortic lysates from ApoE<sup>-/-</sup> mice or ApoE<sup>-/-/Casp-1<sup>-/-</sup> mice. Two aortas were pooled together for blotting each array. The signal areas of a caspase-1 substrate, IL-1 $\beta$ , in two arrays were selectively highlighted with red boxes. **C.** The quantification of cytokine and chemokine expressions. The variations of the manufacturer's designate positive control (PC) spots between each array were used to determine the confidence interval of non-specific variations between samples (n=4 for each group). \*, p<0.05 indicates the expression changes with statistical significance.</sup>

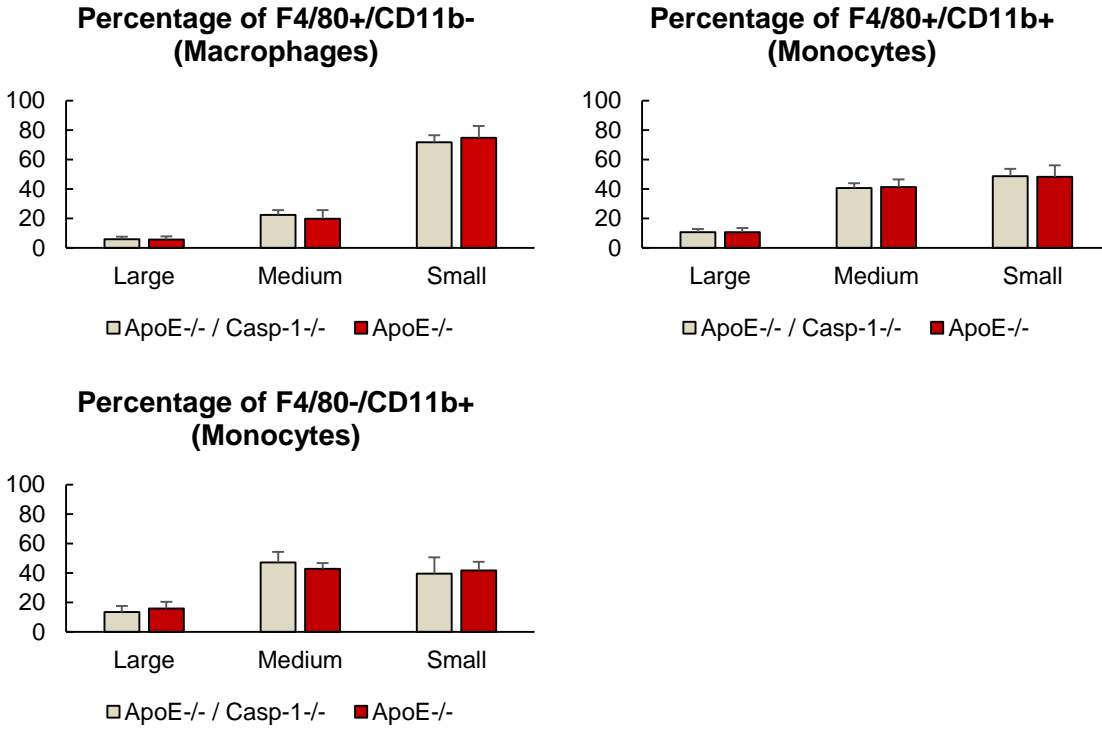

**Figure III. No differences are found between the proliferation of macrophages/monocytes in ApoE<sup>-/-</sup> Casp-1<sup>-/-</sup> mouse aortas and that of ApoE<sup>-/-</sup> mice as reflected by the cell size. Cell size is determined with the scales of forward scatter by flow cytometry as an estimate of cell proliferation status.**

**A.**

|   |        |        |               |        |      |       |         |               |               |              |        |        |    |    |    |    |    |    |    |    |    |    |    |    |
|---|--------|--------|---------------|--------|------|-------|---------|---------------|---------------|--------------|--------|--------|----|----|----|----|----|----|----|----|----|----|----|----|
|   | 1      | 2      | 3             | 4      | 5    | 6     | 7       | 8             | 9             | 10           | 11     | 12     | 13 | 14 | 15 | 16 | 17 | 18 | 19 | 20 | 21 | 22 | 23 | 24 |
| A | PC     |        |               |        |      |       |         |               |               |              |        |        |    |    |    |    |    |    |    |    |    |    |    | PC |
| B | CXCL13 | C5a    | G-CSF         | GM-CSF | CCL1 | CCL11 | sICAM-1 | IFN- $\gamma$ | IL-1 $\alpha$ | IL-1 $\beta$ | IL-1ra | IL-2   |    |    |    |    |    |    |    |    |    |    |    |    |
| C | IL-3   | IL-4   | IL-5          | IL-6   | IL-7 | IL-10 | IL-13   | IL-12p70      | IL-16         | IL-17        | IL-23  | IL-27  |    |    |    |    |    |    |    |    |    |    |    |    |
| D | CXCL10 | CXCL11 | CXCL1         | M-CSF  | CCL2 | CCL12 | CXCL9   | CCL3          | CCL4          | MIP-2        | CCL5   | CXCL12 |    |    |    |    |    |    |    |    |    |    |    |    |
| E | CCL17  | TIMP-1 | TNF- $\alpha$ | TREM-1 |      |       |         |               |               |              |        |        |    |    |    |    |    |    |    |    |    |    |    |    |
| F | PC     |        |               |        |      |       |         |               |               |              |        |        |    |    |    |    |    |    |    |    |    |    |    | NC |

**B.**

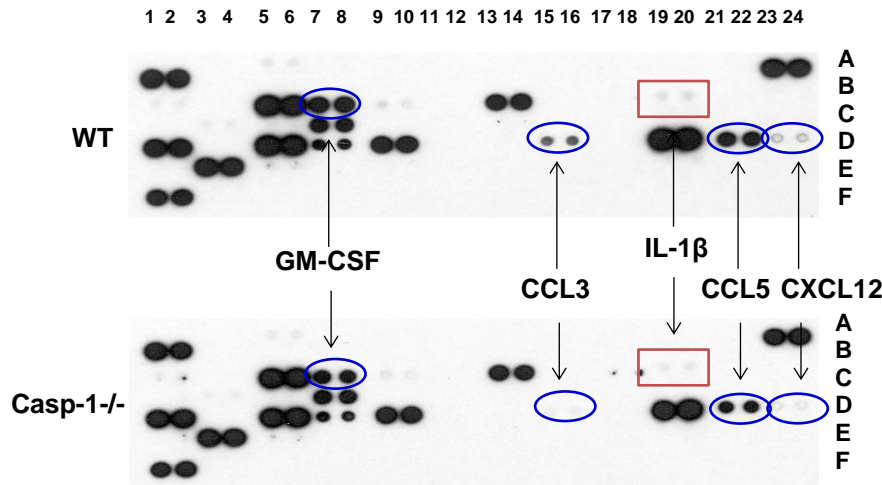

**C.**

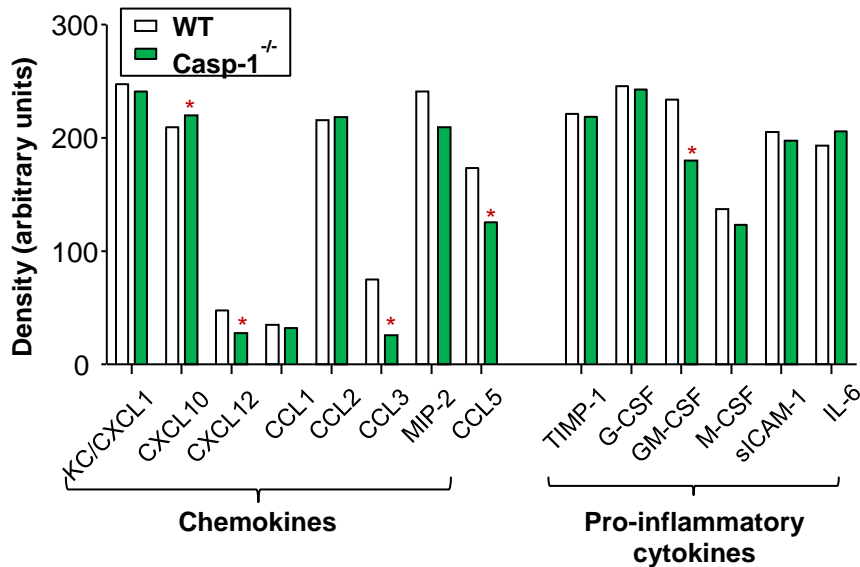

**Figure IV. Caspase-1 Promotes Secretome of Pro-inflammatory Cytokines and Chemokines in MAECs.** **A.** Layout of the cytokines and chemokine array purchased from R&D systems. **B.** Array images of the culture supernatant from WT MAECs or Casp-1<sup>-/-</sup> MAECs cultured and primed with 50ng/ml LPS and treated with 200  $\mu$ g/ml oxLDL for 24 hours followed with ATP (5mM) spike for 20 min. The array spots of IL-1 $\beta$  were highlighted with the red boxes where the array spots of GM-CSF, CCL3, CCL5 and CXCL12 were indicated with the black ovals, respectively. **C.** The quantification of cytokine and chemokine expressions. The variations of the manufacturer's designate positive control (PC) spots between each array were used to determine the confidence interval of non-specific variations between samples (n=2 for each group). \*,  $p < 0.05$  change with significance.

## A. NIH-NCBI BLAST homology

|                    |                                                                   |     |
|--------------------|-------------------------------------------------------------------|-----|
| 1                  | MADEVALALQAAGSPSAAAA-MEASQPADEPLRKRPRRDGPGGLGRSPGEPSSAA-----V     | 54  |
| 1                  | MADE ALALQ GSPSAA A EAAS PA EPLRKRPRRDGPGGL RSPGEP A V            |     |
| 1                  | MADEAALALQPGGSPSAAAGADREAAASSPAGEPLRKRPRRDGPGGLERSPGEPGGAAPEREV   | 60  |
| 55                 | APAAAGCEAASAAAPALWREAAGAAASAEREAPATAVAGDGDNGSGLR---REPRRAADD      | 111 |
| 61                 | AA GC A+AAA A AA + ATA AG+GDNG GL+ REP AD+                        |     |
| 61                 | PAARAGCPGAAAAALWREAEEAAAAGGEQEAQ-ATAAAGEGDNGPGGLQGPSREPPPLADN     | 119 |
| <b>Mouse SIRT1</b> | 112 FDDDEGEDEEAAAAAAAAAIGYRDNLLLTGLLTNGFHSCESDDDDRTSHASSSDWTFR    | 171 |
| <b>Human SIRT1</b> | 120 LYDEDDDEGEDEEAAAAAAAAAIGYRDNLLFGEIITNGFHSCESDEEDRASHASSSDWTFR | 179 |
| 172                | PRIGPYTFVQQHLMIGTDPRTILKDLLPETIPPELDDMTLWQIVINILSEPPKRRKRRKD      | 231 |
| 180                | PRIGPYTFVQQHLMIGTDPRTILKDLLPETIPPELDDMTLWQIVINILSEPPKRRKRRKD      | 239 |
| 232                | INTIEDAVKLLQECKKIIIVLTGAGVSVSCGIPDFRSRDGIYARLAVDFPDLDPQAMFDI      | 291 |
| 240                | INTIEDAVKLLQECKKIIIVLTGAGVSVSCGIPDFRSRDGIYARLAVDFPDLDPQAMFDI      | 299 |
| 292                | EYFRKDPFPFFKFAKEIYPGQFQPSLCHKFIALSDKEGKLLRNYTQNMIDTLEQVAGIQRI     | 351 |
| 300                | EYFRKDPFPFFKFAKEIYPGQFQPSLCHKFIALSDKEGKLLRNYTQNMIDTLEQVAGIQRI     | 359 |
| 352                | LQCHGSFATASCLICKYKVDCEAVRGDIFNQVVRCPRCPPADEPLAIMKPEIVFFGENLP      | 411 |
| 360                | IQCHGSFATASCLICKYKVDCEAVRGDIFNQVVRCPRCPPADEPLAIMKPEIVFFGENLP      | 419 |
| 412                | EQFHRAMKYDKDEVDLLIVIGSSLKVRPVALIPSSIPHEVPQILINREPLPHLHFDVELL      | 471 |
| 420                | EQFHRAMKYDKDEVDLLIVIGSSLKVRPVALIPSSIPHEVPQILINREPLPHLHFDVELL      | 479 |
| 472                | GDCDVIINELCHRLGGEYAKLCCNPVKLSEITEKPPRPQKELVHLSLPPPTPLHISEDSS      | 531 |
| 480                | GDCDVIINELCHRLGGEYAKLCCNPVKLSEITEKPPRTQKELAYLSLPPPTPLHVSSEDSS     | 539 |
| 532                | SPERTVPQDSSVIATLVDQATNNVNDLEVSES-SCVEEKPOEVQTSRNVENI--NVENP       | 588 |
| 540                | SPERT P DSSVI TL+DQA +N +DL+VSES C+EEKPOEVQTSRNV+I +ENP           |     |
| 540                | SPERTSPDSSVIVTLLDQAASN-DLDVSESKGCMEKPOEVQTSRNVESIAEQMENP          | 598 |
| 589                | DFKAVGSSSTADKNERTSVAETVRKWCWPNRLAKEQISKRLEGNQYLFVPPNRYIFHGAEVY    | 648 |
| 599                | DLKNVGSSTGKKNERTSVAGTVRKCWPNRVAKEQISRRLDGNQYLFVPPNRYIFHGAEVY      | 658 |
| 649                | SDSEDDVLSSSSSCGSNSDSGTCQSPSLEEPLEDESEIEEFYNGLEDTERPECAGGSGFG      | 708 |
| 659                | SDSEDDVLSSSSSCGSNSDSGTCQSPSLEEPMEDESEIEEFYNGLED+ + PE AGG+GFG     | 718 |
| 709                | ADGGDQEVVNEAIAIRQELTDVNYPSDKS 737                                 |     |
|                    | DG DQE +NEAI+ +QE+TD+NYPSS+KS                                     |     |
| 719                | TDGDDEAINEAISVKQEVTDVNYPSNKS 747                                  |     |

| Species     | Casp1 Cleavage Site                                                                                            |
|-------------|----------------------------------------------------------------------------------------------------------------|
| Mouse SIRT1 | D142 (Chalkiadaki, A, et al. Cell Metab., 2012)                                                                |
| Human SIRT1 | D150 (BLAST search and confirmation by our previously published method: Shen, J, et al. Atherosclerosis, 2008) |

## B.

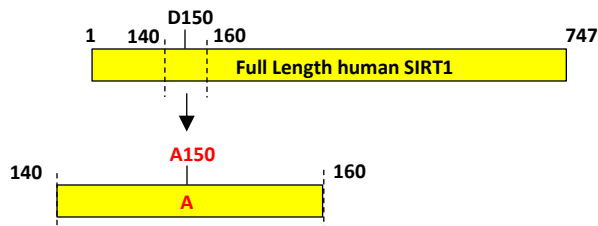

**Figure V. Generation of Cell-permeable non-Casp1 cleavable Sirt1 polypeptide. A. NIH-NCBI Blast homology search between mouse SIRT1 (upper) and human SIRT1 (lower). Caspase-1 cleavage site is highlighted in the red box. B. The non-cleavable Sirt1 polypeptide was generated with a single amino acid replacement in the sequence from 140-160 position of human SIRT1. Caspase-1 cleavage site D150 from human SIRT1 was mutated to A150, rendering the peptide sequence non-casp1 cleavable.**

| Name of enzyme | Predicted No. of cleavages | Predicted Positions of cleavage sites | Regulated by Apocynin | PMID     |
|----------------|----------------------------|---------------------------------------|-----------------------|----------|
| Caspase-1      | 1                          | 528                                   | Yes                   | N/A      |
| Caspase-3      | 1                          | 242                                   | Yes                   | 19592621 |
| Caspase-7      | 1                          | 242                                   | Not Tested            | N/A      |
| Thrombin       | 1                          | 202                                   | Not Tested            | N/A      |
| Caspase-10     | 0                          |                                       |                       | N/A      |
| Caspase-2      | 0                          |                                       |                       | N/A      |
| Caspase-4      | 0                          |                                       |                       | N/A      |
| Caspase-5      | 0                          |                                       |                       | N/A      |
| Caspase-6      | 0                          |                                       |                       | N/A      |
| Caspase-8      | 0                          |                                       |                       | N/A      |
| Caspase-9      | 0                          |                                       |                       | N/A      |
| Enterokinase   | 0                          |                                       |                       | N/A      |
| Factor Xa      | 0                          |                                       |                       | N/A      |
| Granzyme B     | 0                          |                                       |                       | N/A      |

**Table I. Predicated proteinases for human Sirt1 protein cleavage.** The analysis with the PeptideCutter database predicted potential proteinases for human Sirt1 protein cleavages. Data are expressed as mean  $\pm$  SE. \*,  $p < 0.05$ , changes with statistical significance.

**A.**

| Gene ID      | PMID (Ap1 Target genes) | Fold Change | Microarray data obtained via mining |                             |          |
|--------------|-------------------------|-------------|-------------------------------------|-----------------------------|----------|
|              |                         |             | p                                   | Comparison                  | PMID     |
| CCL1*†       | 22311973                | 1.456       | 0.0084                              | Sirt1 (-/-) vs. WT          | 22715468 |
| CCL2*        | 8630731                 | 2.364       | 0.0155                              | Sirt1 (-/-) vs. WT With HFD |          |
| CCL3†        | 14747532                | 8.623       | 0.0000                              | Sirt1 (-/-) vs. WT With HFD | 22883230 |
| CCL4*        | 18789903                | 2.736       | 0.0000                              | Sirt1 (-/-) vs. WT With HFD |          |
| CCL17*       | 14747532                | 1.591       | 0.0010                              | Sirt1 (-/-) vs. WT With LFD |          |
| GM-CSF*†     | 9190901                 | 2.265       | 0.0084                              | Sirt1(-/+) vs. Sirt1(+/+)   | 22006157 |
| CXCL12†      | 17393416                | 1.813       | 0.0172                              | Sirt1 (-/-) vs. WT          | 22169038 |
| IL2*         | 1737937                 | 1.184       | 0.0469                              | Sirt1 (-/-) vs. WT With LFD | 22883230 |
|              |                         | 1.339       | 0.0258                              | Sirt1 (-/-) vs. WT          | 22715468 |
|              |                         | 1.372       | 0.0024                              | Sirt1 (-/-) vs. WT          |          |
| EBI3 (IL27)* | 15728491                | 1.484       | 0.0032                              | Sirt1 (-/-) vs. WT With HFD |          |
|              |                         | 2.014       | 0.0004                              | Sirt1 (-/-) vs. WT With LFD |          |
|              |                         | 3.018       | 0.0021                              | Sirt1 (-/-) vs. WT With HFD | 22883230 |
| TIMP1*       | 10051488                | 1.435       | 0.0068                              | Sirt1 (-/-) vs. WT With LFD |          |
|              |                         | 1.638       | 0.0003                              | Sirt1 (-/-) vs. WT With HFD |          |
|              |                         | 1.169       | 0.0445                              | Sirt1 (-/-) vs. WT With LFD |          |
| VCAM1‡       | 1379595                 | 1.824       | 0.0285                              | Sirt1 (-/-) vs. WT          | 22169038 |
|              |                         | 1.433       | 0.0213                              | Sirt1 (-/-) vs. WT          |          |
|              |                         | 1.306       | 0.0055                              | Sirt1 (-/-) vs. WT With LFD |          |
| IL16*        | 9990060                 | 3.764       | 0.0054                              | Sirt1 (-/-) vs. WT With LFD | 22883230 |
|              |                         | 1.317       | 0.0248                              | Sirt1 (-/-) vs. WT With LFD |          |
| CCL12*       | Not found               | 2.262       | 0.0115                              | Sirt1(-/+) vs. Sirt1(+/+)   | 22006157 |
|              |                         |             |                                     |                             |          |

**B.**

| Gene | Fold Change | p        | Compares                 | PMID     |
|------|-------------|----------|--------------------------|----------|
| Jun  | 1.778       | 0.000495 | Sirt1 KO vs. WT with LFD | 22883230 |
| Fos  | 3.523       | 0.017899 | Sirt1 KO vs. WT with LFD | 22883230 |
| Fos1 | 3.022       | 0.000628 | Sirt1 KO vs. WT with HFD | 22883230 |

**Table II. Caspase-1 induces upregulation of proinflammatory cytokines, chemokines and adhesion molecules via sirtuin 1 (Sirt1)-AP-1 pathway.** **A.** Caspase-1-induced molecules have the AP-1 binding site in their promoters and Sirt1 gene deficiency increases the expression of caspase-1-induced molecules. The list of PubMed IDs showed that published papers experimentally identified AP-1 binding site in their promoters of caspase-1 induced genes except CCL-12 and IL-7. The database mining analysis of published microarray data of Sirt1 gene deficient (-/-) mice versus wild-type control mice demonstrated that Sirt1 deficiency increases the expression of caspase-1-induced genes. The symbols indicate the figures, in which the results showed that caspase-1 induced the gene upregulation/secretion: \*Figure S2, †Figure S4, ‡Fig.4). **B.** Sirtuin 1 deficiency increases the expression of AP-1 gene expression. The AP-1 subunits expression was retrieved from Sirt1 KO (knockout) microarray dataset GSE30247.
